# Supplementary material for: Hand osteoarthritis is associated with limitations in paid and unpaid work participation and related societal costs: the HOSTAS cohort
Source: HighWire-hosted journal article supplement (doi:10.1136/rmdopen-2022-002367), 2022-07-01
Supplement: rmdopen-2022-002367supp001_data_supplement.pdf [file rmdopen-2022-002367supp001_data_supplement.pdf]

## Appendix 1 – conversion rates to 2019

| year                          | % compared with 2015 Dutch price levels | formula for conversion to 2019 Dutch price levels         | conversion factor to 2019 Dutch price levels |
|-------------------------------|-----------------------------------------|-----------------------------------------------------------|----------------------------------------------|
| 2001                          | 0.78                                    | 1.061 * (1/0.78)                                          | 1.360                                        |
| 2006                          | 0.8582                                  | 1.061 * (1/0.8582)                                        | 1.236                                        |
| 2009                          | 0.9271                                  | 1.061 * (1/0.9271)                                        | 1.144                                        |
| 2010                          | 0.9371                                  | 1.061 * (1/0.9371)                                        | 1.132                                        |
| 2011                          | 0.9574                                  | 1.061 * (1/0.9574)                                        | 1.108                                        |
| 2012                          | 0.9771                                  | 1.061 * (1/0.9771)                                        | 1.086                                        |
| 2013                          | 0.9897                                  | 1.061 * (1/0.9897)                                        | 1.072                                        |
| 2014                          | 0.996                                   | 1.061 * (1/0.996)                                         | 1.065                                        |
| 2015                          | 1.00                                    | * 1.061                                                   | 1.061                                        |
| 2019                          | 1.061                                   |                                                           | 1                                            |
| citation number in manuscript | Currency conversion and concerning year | average conversion factor to Euro for the concerning year | conversion factor to Euros in 2019           |
| 10                            | Canadian Dollar to euro in 2006         | 0.694 (year 2006)                                         | 0.694 * 1.236 = 0.858                        |
| 11                            | American Dollar to Euro in 2011         | 0.719 (year 2011)                                         | 0.719 * 1.108 = 0.797                        |

Sources: Dutch price levels per year: <https://opendata.cbs.nl/#/CBS/en/dataset/83131ENG/table> Canadian Dollar to Euro in 2006: <https://freecurrencyrates.com/en/exchange-rate-history/EUR-CAD/2006/cbr>, American Dollar to Euro in 2011: <https://www.exchangerates.org.uk/USD-EUR-spot-exchange-rates-history-2011.html#:~:text=Average%20exchange%20rate%20in%202011%3A%200.719%20EUR>. All sources consulted November 11th, 2021
