# Supplementary material for: Hand osteoarthritis is associated with limitations in paid and unpaid work participation and related societal costs: the HOSTAS cohort
Source: HighWire-hosted journal article supplement (doi:10.1136/rmdopen-2022-002367), 2022-07-01
Supplement: rmdopen-2022-002367supp001_data_supplement.pdf [file rmdopen-2022-002367supp001_data_supplement.pdf]

**Appendix 1 – conversion rates to 2019**

| <b>year</b>                          | <b>% compared with 2015 Dutch price levels</b> | <b>formula for conversion to 2019 Dutch price levels</b>         | <b>conversion factor to 2019 Dutch price levels</b> |
|--------------------------------------|------------------------------------------------|------------------------------------------------------------------|-----------------------------------------------------|
| 2001                                 | 0.78                                           | $1.061 * (1/0.78)$                                               | 1.360                                               |
| 2006                                 | 0.8582                                         | $1.061 * (1/0.8582)$                                             | 1.236                                               |
| 2009                                 | 0.9271                                         | $1.061 * (1/0.9271)$                                             | 1.144                                               |
| 2010                                 | 0.9371                                         | $1.061 * (1/0.9371)$                                             | 1.132                                               |
| 2011                                 | 0.9574                                         | $1.061 * (1/0.9574)$                                             | 1.108                                               |
| 2012                                 | 0.9771                                         | $1.061 * (1/0.9771)$                                             | 1.086                                               |
| 2013                                 | 0.9897                                         | $1.061 * (1/0.9897)$                                             | 1.072                                               |
| 2014                                 | 0.996                                          | $1.061 * (1/0.996)$                                              | 1.065                                               |
| 2015                                 | 1.00                                           | $* 1.061$                                                        | 1.061                                               |
| 2019                                 | 1.061                                          |                                                                  | 1                                                   |
| <b>citation number in manuscript</b> | <b>Currency conversion and concerning year</b> | <b>average conversion factor to Euro for the concerning year</b> | <b>conversion factor to Euros in 2019</b>           |
| 10                                   | Canadian Dollar to euro in 2006                | 0.694 (year 2006)                                                | $0.694 * 1.236 = 0.858$                             |
| 11                                   | American Dollar to Euro in 2011                | 0.719 (year 2011)                                                | $0.719 * 1.108 = 0.797$                             |

Sources: Dutch price levels per year: <https://opendata.cbs.nl/#/CBS/en/dataset/83131ENG/table> Canadian Dollar to Euro in 2006: <https://freecurrencyrates.com/en/exchange-rate-history/EUR-CAD/2006/cbr>, American Dollar to Euro in 2011: <https://www.exchangerates.org.uk/USD-EUR-spot-exchange-rates-history-2011.html#:~:text=Average%20exchange%20rate%20in%202011%3A%200.719%20EUR>. All sources consulted November 11th, 2021
