# Supplementary material for: Hand osteoarthritis is associated with limitations in paid and unpaid work participation and related societal costs: the HOSTAS cohort
Source: HighWire-hosted journal article supplement (doi:10.1136/rmdopen-2022-002367), 2022-07-01
Supplement: rmdopen-2022-002367supp002_data_supplement.pdf [file rmdopen-2022-002367supp002_data_supplement.pdf]

## Appendix 2. amounts of missing data for each outcome of our study.

Table 1. Missing characteristics of our present study population, and of patients with paid work

|                                             | Total study population (n=381) | Patients with paid work (47%, n=181) |
|---------------------------------------------|--------------------------------|--------------------------------------|
| <b>General patient characteristics</b>      |                                |                                      |
| Age, years                                  | 0 (0%)                         | 0 (0%)                               |
| Sex                                         | 0 (0%)                         | 0 (0%)                               |
| BMI, kg/m <sup>2</sup>                      | 16 (2%)                        | 8 (4%)                               |
| Living with a partner                       | 0 (0%)                         | 0 (0%)                               |
| Educational level                           | 2 (1%)                         | 2 (1%)                               |
| <b>Hand-specific characteristics</b>        |                                |                                      |
| Fulfilling ACR hand OA criteria             | 0 (0%)                         | 0 (0%)                               |
| Erosive hand OA                             | 3 (1%)                         | 0 (0%)                               |
| Symptom duration, years                     | 52 (14%)                       | 25 (14%)                             |
| AUSCAN hand pain (0-20)                     | 1 (0%)                         | 0 (0%)                               |
| AUSCAN hand function (0-36)                 | 2 (1%)                         | 0 (0%)                               |
| Tender joint count (0-30)                   | 0 (0%)                         | 0 (0%)                               |
| KL summated score (0-120)                   | 3 (1%)                         | 0 (0%)                               |
| <b>General burden</b>                       |                                |                                      |
| Any comorbidity present                     | 0 (0%)                         | 0 (0%)                               |
| Amount of comorbidities                     | 0 (0%)                         | 0 (0%)                               |
| Fulfilling ACR hip osteoarthritis criteria  | 1 (0%)                         | 0 (0%)                               |
| Fulfilling ACR knee osteoarthritis criteria | 1 (0%)                         | 0 (0%)                               |
| HADS total score (0-42)                     | 2 (0%)                         | 0 (0%)                               |
| <b>Work characteristics</b>                 |                                |                                      |
| Retired                                     | 0 (0%)                         | 0 (0%)                               |
| Full work disability                        | 0 (0%)                         | 0 (0%)                               |
| Full work disability due to hand OA         | 0 (0%)                         | 0 (0%)                               |
| Partial work disability                     | 0 (0%)                         | 0 (0%)                               |
| Partial work disability due to hand OA      | 0 (0%)                         | 0 (0%)                               |
| Predominantly manual profession             | 43 (11%)                       | 16 (9%)                              |

\* Defined as a score of 5 or 6 on the scale by de Zwart et al. Abbreviations: BMI = Body Mass Index, HADS = Hospital Anxiety and Depression Scale, ACR = American College of Rheumatology, AUSCAN = Australian Canadian Osteoarthritis Hand Index, KL = Kellgren Lawrence.

Table 2. Missing paid work outcomes of the Health and Labour Questionnaire concerning the last two weeks for patients having paid work (181 out of 381 patients)

|                                                                                             |         |
|---------------------------------------------------------------------------------------------|---------|
| Hours of paid work per week                                                                 | 3 (2%)  |
| <b>Absenteeism due to hand OA</b>                                                           |         |
| Any absenteeism                                                                             | 2 (1%)  |
| Hours of absenteeism                                                                        | 3 (2%)  |
| <b>Unproductiveness at work due to hand OA</b>                                              |         |
| Unproductiveness due to hand OA                                                             | 0 (0%)  |
| Hours of unproductiveness due to hand OA, if any                                            | 0 (0%)  |
| <b>Overall work productivity loss due to hand OA (= absenteeism and unproductive hours)</b> |         |
| Any work productivity loss due to hand OA                                                   | 3 (2%)  |
| Hours of work productivity loss due to hand OA, if any                                      | 2 (1%)  |
| <b>Activity restrictions at work due to hand OA</b>                                         |         |
| Any form of hinder at work due to hand OA                                                   | 10 (5%) |
| Hinder score complaints at work (6 - 24)                                                    | 10 (5%) |
| Impaired concentration due to hand OA                                                       | 10 (5%) |

|                                                 |         |
|-------------------------------------------------|---------|
| Needing to slow down work pace due to hand OA   | 10 (5%) |
| Needing to seclude oneself due to hand OA       | 11 (5%) |
| Difficulties in making decisions due to hand OA | 10 (5%) |
| Inability to complete work due to hand OA       | 10 (5%) |
| Needing assistance at work due to hand OA       | 10 (5%) |

Abbreviations: OA = osteoarthritis.

**Table 3. Missing outcomes of the comparison of patients with and without productivity loss due to hand OA**

|                                             | Patients with paid work (n=181)          |                                              | All patients (n=381)                        |                                                |
|---------------------------------------------|------------------------------------------|----------------------------------------------|---------------------------------------------|------------------------------------------------|
|                                             | Paid work<br>productivity loss<br>(n=36) | No paid work<br>productivity loss<br>(n=145) | Unpaid work<br>productivity loss<br>(n=171) | No unpaid work<br>productivity loss<br>(n=210) |
| <b>General patient characteristics</b>      |                                          |                                              |                                             |                                                |
| Age, years                                  | 0 (0%)                                   | 0 (0%)                                       | 0 (0%)                                      | 0 (0%)                                         |
| Sex, women                                  | 0 (0%)                                   | 0 (0%)                                       | 0 (0%)                                      | 0 (0%)                                         |
| BMI, kg/m <sup>2</sup>                      | 0 (0%)                                   | 8 (6%)                                       | 7 (4%)                                      | 9 (4%)                                         |
| Living with a partner                       | 0 (0%)                                   | 0 (0%)                                       | 0 (0%)                                      | 0 (0%)                                         |
| Education, high <sup>§</sup>                | 0 (0%)                                   | 2 (1%)                                       | 0 (0%)                                      | 2 (1%)                                         |
| <b>Hand-specific characteristics</b>        |                                          |                                              |                                             |                                                |
| Fulfilling ACR hand OA criteria             | 0 (0%)                                   | 0 (0%)                                       | 0 (0%)                                      | 0 (0%)                                         |
| Erosive hand OA                             | 0 (0%)                                   | 0 (0%)                                       | 2 (1%)                                      | 1 (0%)                                         |
| Symptom duration, years <sup>^</sup>        | 3 (8%)                                   | 22 (15%)                                     | 29 (17%)                                    | 23 (11%)                                       |
| AUSCAN hand pain (0-20)                     | 0 (0%)                                   | 0 (0%)                                       | 1 (1%)                                      | 1 (0%)                                         |
| AUSCAN hand function (0-36)                 | 0 (0%)                                   | 0 (0%)                                       | 0 (0%)                                      | 1 (0%)                                         |
| Tender joint count (0-30) <sup>^</sup>      | 0 (0%)                                   | 0 (0%)                                       | 0 (0%)                                      | 0 (0%)                                         |
| KL summated score (0-120) <sup>^</sup>      | 0 (0%)                                   | 0 (0%)                                       | 1 (1%)                                      | 2 (1%)                                         |
| <b>General burden</b>                       |                                          |                                              |                                             |                                                |
| Any comorbidity present                     | 0 (0%)                                   | 0 (0%)                                       | 0 (0%)                                      | 0 (0%)                                         |
| Amount of comorbidities <sup>^</sup>        | 0 (0%)                                   | 0 (0%)                                       | 0 (0%)                                      | 0 (0%)                                         |
| Fulfilling ACR hip osteoarthritis criteria  | 0 (0%)                                   | 0 (0%)                                       | 0 (0%)                                      | 1 (0%)                                         |
| Fulfilling ACR knee osteoarthritis criteria | 0 (0%)                                   | 0 (0%)                                       | 2 (1%)                                      | 3 (1%)                                         |
| HADS total score (0-42) <sup>^</sup>        | 0 (0%)                                   | 0 (0%)                                       | 2 (1%)                                      | 0 (0%)                                         |
| <b>Work characteristics</b>                 |                                          |                                              |                                             |                                                |
| Retired                                     | 0 (0%)                                   | 0 (0%)                                       | 0 (0%)                                      | 0 (0%)                                         |
| Full work disability                        | 0 (0%)                                   | 0 (0%)                                       | 0 (0%)                                      | 0 (0%)                                         |
| Full work disability due to hand OA, n (%)  | 0 (0%)                                   | 0 (0%)                                       | 0 (0%)                                      | 0 (0%)                                         |
| Partial work disability                     | 0 (0%)                                   | 0 (0%)                                       | 0 (0%)                                      | 0 (0%)                                         |
| Partial work disability due to hand OA      | 0 (0%)                                   | 0 (0%)                                       | 0 (0%)                                      | 0 (0%)                                         |
| Unpaid work replacement                     | 0 (0%)                                   | 0 (0%)                                       | -                                           | -                                              |
| Paid work productivity loss                 | -                                        | -                                            | 0 (0%)                                      | 0 (0%)                                         |
| Predominantly manual profession*            | 6 (17%)                                  | 45 (31%)                                     | 47 (27%)                                    | 67 (32%)                                       |

Numbers represent amount (percentage of the total study sample). § defined as having completed university level education. ^ median ^ median (IQR). \* Defined as a score of 5 or 6 on the scale by de Zwart et al (21). Abbreviations: SD = standard deviation, BMI = Body Mass Index, HADS = Hospital Anxiety and Depression Scale, ACR = American College of Rheumatology, AUSCAN = Australian Canadian Osteoarthritis Hand Index, KL = Kellgren Lawrence.

**Table 4. Missing outcomes of the Health and Labour Questionnaire for all patients (n=381), concerning unpaid work in the last two weeks**

| Activities                   | Hours performed | Perceived hinder due to hand OA | Patients needing replacement | Hours replaced in case of replacement |
|------------------------------|-----------------|---------------------------------|------------------------------|---------------------------------------|
| Total                        | 0 (0%)          | 0 (0%)                          | 0 (0%)                       | 0 (0%)                                |
| Housekeeping                 | 1 (0%)          | 5 (1%)                          |                              |                                       |
| Groceries                    | 1 (0%)          | 7 (2%)                          |                              |                                       |
| Chores                       | 19 (5%)         | 7 (3%)                          |                              |                                       |
| Activities with own children | 20 (8%)         | 5 (1%)                          |                              |                                       |

Numbers represent amount (percentage) of the concerning study sample. Abbreviations: OA = osteoarthritis

**Table 5. Missing societal costs of paid and unpaid work due to hand OA**

|                                                                                             | All patients (n=381) | Patients with paid work (n=181) | Patients under 65 years of age (n=263) |
|---------------------------------------------------------------------------------------------|----------------------|---------------------------------|----------------------------------------|
| <b>Cause of costs</b>                                                                       |                      |                                 |                                        |
| <b>Absenteeism</b>                                                                          |                      |                                 |                                        |
| Mean costs per two weeks                                                                    | 2 (1%)               | 2 (1%)                          | 2 (1%)                                 |
| Mean costs per year                                                                         | 2 (1%)               | 2 (1%)                          | 2 (1%)                                 |
| Median costs per two weeks only for patients generating any costs^ (€) (amount of patients) | 2 (1%)               | 2 (1%)                          | 2 (1%)                                 |
| <b>Unproductive hours at paid work</b>                                                      |                      |                                 |                                        |
| Mean costs per two weeks                                                                    | 0 (0%)               | 0 (0%)                          | 0 (0%)                                 |
| Mean costs per year                                                                         | 0 (0%)               | 0 (0%)                          | 0 (0%)                                 |
| Median costs per two weeks only for patients generating any costs^ (€) (amount of patients) | 0 (0%)               | 0 (0%)                          | 0 (0%)                                 |
| <b>Paid work productivity loss (= absenteeism + unproductive hours at work)</b>             |                      |                                 |                                        |
| Mean costs per two weeks                                                                    | 2 (1%)               | 2 (1%)                          | 2 (1%)                                 |
| Mean costs per year                                                                         | 2 (1%)               | 2 (1%)                          | 2 (1%)                                 |
| Median costs per two weeks only for patients generating any costs^ (€) (amount of patients) | 2 (1%)               | 2 (1%)                          | 2 (1%)                                 |
| <b>Total unpaid work replacement by others</b>                                              |                      |                                 |                                        |
| Mean costs per two weeks                                                                    | 0 (0%)               | 0 (0%)                          | 0 (0%)                                 |
| Mean costs per year                                                                         | 0 (0%)               | 0 (0%)                          | 0 (0%)                                 |
| Median costs per two weeks only for patients generating any costs^ (€) (amount of patients) | 0 (0%)               | 0 (0%)                          | 0 (0%)                                 |
| <b>Total paid and unpaid work productivity loss</b>                                         |                      |                                 |                                        |
| Mean costs per two weeks                                                                    | 0 (0%)               | 0 (0%)                          | 0 (0%)                                 |
| Mean costs per year                                                                         | 0 (0%)               | 0 (0%)                          | 0 (0%)                                 |
| Median costs per two weeks only for patients generating any costs^ (€) (amount of patients) | 0 (0%)               | 0 (0%)                          | 0 (0%)                                 |

Numbers represent amount (percentage) of the concerning study sample)
