# Supplementary material for: Hand osteoarthritis is associated with limitations in paid and unpaid work participation and related societal costs: the HOSTAS cohort
Source: HighWire-hosted journal article supplement (doi:10.1136/rmdopen-2022-002367), 2022-07-01
Supplement: rmdopen-2022-002367supp003_data_supplement.pdf [file rmdopen-2022-002367supp003_data_supplement.pdf]

## Appendix 3. Outcomes for solely the part of our population under 65 years of age.

Table 1. Characteristics of our present study population, and of patients with paid work

|                                                    | Total study population (n=263) | Patients with paid work (67%, n=175) |
|----------------------------------------------------|--------------------------------|--------------------------------------|
| <b>General patient characteristics</b>             |                                |                                      |
| Age, years                                         | 56 (5)                         | 55 (5)                               |
| Sex, women, n (%)                                  | 225 (86%)                      | 147 (84%)                            |
| BMI, kg/m <sup>2</sup>                             | 27.9 (5.1)                     | 27.5 (5.3)                           |
| Living with a partner, n (%)                       | 219 (83%)                      | 146 (83%)                            |
| Education, high <sup>§</sup> , n (%)               | 68 (22%)                       | 55 (31%)                             |
| <b>Hand-specific characteristics</b>               |                                |                                      |
| Fulfilling ACR hand OA criteria, n (%)             | 231 (88%)                      | 149 (85%)                            |
| Erosive hand OA, n (%)                             | 63 (24%)                       | 38 (22%)                             |
| Symptom duration, years <sup>^</sup>               | 4.7 (1.8;10.0)                 | 4.2 (1.6;8.4)                        |
| AUSCAN hand pain (0-20)                            | 9 (4)                          | 9 (5)                                |
| AUSCAN hand function (0-36)                        | 15 (8)                         | 15 (9)                               |
| Tender joint count (0-30) <sup>^</sup>             | 3 (1;6)                        | 3 (1;6)                              |
| KL summated score (0-120) <sup>^</sup>             | 13 (6;23)                      | 12 (5;21)                            |
| <b>General burden</b>                              |                                |                                      |
| Any comorbidity present, n (%)                     | 139 (53%)                      | 84 (48%)                             |
| Amount of comorbidities <sup>^</sup>               | 1 (0;1)                        | 0 (0;1)                              |
| Fulfilling ACR hip osteoarthritis criteria, n (%)  | 18 (7%)                        | 9 (5%)                               |
| Fulfilling ACR knee osteoarthritis criteria, n (%) | 43 (16%)                       | 27 (15%)                             |
| HADS total score (0-42) <sup>^</sup>               | 7 (4;11)                       | 7 (4;11)                             |
| <b>Work characteristics</b>                        |                                |                                      |
| Retired, n (%)                                     | 17 (7%)                        | -                                    |
| Full work disability, n (%)                        | 24 (9%)                        | -                                    |
| Full work disability due to hand OA, n (%)         | 0 (0%)                         | -                                    |
| Partial work disability, n (%)                     | 10 (4%)                        | 8 (5%)                               |
| Partial work disability due to hand OA, n (%)      | 0 (0%)                         | 0 (0%)                               |
| Predominantly manual profession*, n (%)            | 19 (7%)                        | 10 (6%)                              |

Numbers represent mean (SD) unless otherwise specified. <sup>^</sup>median (IQR). <sup>§</sup> defined as having completed university level education. \* Defined as a score of 5 or 6 on the scale by de Zwart et al (21). Abbreviations: SD = standard deviation, BMI = Body Mass Index, HADS = Hospital Anxiety and Depression Scale, ACR = American College of Rheumatology, AUSCAN = Australian Canadian Osteoarthritis Hand Index, KL = Kellgren Lawrence.

Table 2. Outcomes of the Health and Labour Questionnaire in patients having paid work (175 out of 263 patients), concerning the last two weeks

|                                                                                             |             |
|---------------------------------------------------------------------------------------------|-------------|
| Hours of paid work per week                                                                 | 26.0 (11.8) |
| <b>Absenteeism due to hand OA</b>                                                           |             |
| Any absenteeism, n (%)                                                                      | 13 (7%)     |
| Hours of absenteeism, if any <sup>^</sup> (n=13)                                            | 41 (22;78)  |
| Hours of absenteeism, total group (n=175)                                                   | 3.0 (13.9)  |
| <b>Unproductiveness at work due to hand OA</b>                                              |             |
| Any unproductive hours at work, n (%)                                                       | 28 (16%)    |
| Hours of unproductiveness, if any <sup>^</sup> (n=28)                                       | 4 (2;6)     |
| Hours of unproductiveness, total group (n=175)                                              | 0.7 (2.1)   |
| <b>Overall work productivity loss due to hand OA (= absenteeism and unproductive hours)</b> |             |
| Any work productivity loss, n (%)                                                           | 36 (20%)    |
| Hours of work productivity loss <sup>^</sup> , if any (n=38)                                | 6 (2;19)    |
| Hours of unproductiveness, total group (n=175)                                              | 3.7 (14.4)  |

**Limitations at work due to hand OA**

|                                                                           |          |
|---------------------------------------------------------------------------|----------|
| Any form of hinder at work due to hand OA                                 | 97 (55%) |
| Hinder score complaints at work (6 - 24) <sup>^</sup>                     | 7 (6;9)  |
| Impaired concentration due to hand OA (often or always) (n, %)            | 3 (2%)   |
| Needing to slow down work pace due to hand OA (often or always) (n, %)    | 16 (12%) |
| Needing to seclude oneself due to hand OA (often or always) (n, %)        | 2 (2%)   |
| Difficulties in making decisions due to hand OA (often or always), (n, %) | 0 (0%)   |
| Inability to complete work due to hand OA (often or always), (n, %)       | 1 (1%)   |
| Needing assistance at work due to hand OA (often or always), (n, %)       | 7 (5%)   |

Numbers represent mean (95% confidence interval) unless otherwise specified. <sup>^</sup>median (IQR). Abbreviations: OA = osteoarthritis.

**Table 3. Comparison of patients with and without productivity loss due to hand OA**

|                                                    | Patients with paid work (n=175)    |                                        | All patients (n=263)                  |                                          |
|----------------------------------------------------|------------------------------------|----------------------------------------|---------------------------------------|------------------------------------------|
|                                                    | Paid work productivity loss (n=36) | No paid work productivity loss (n=139) | Unpaid work productivity loss (n=117) | No unpaid work productivity loss (n=146) |
| <b>General patient characteristics</b>             |                                    |                                        |                                       |                                          |
| Age, years                                         | 55 (6)                             | 55 (5)                                 | 56 (5)                                | 57 (5)                                   |
| Sex, women, n (%)                                  | 28 (78%)                           | 119 (86%)                              | 106 (91%)                             | 119 (82%)                                |
| BMI, kg/m <sup>2</sup>                             | 28.2 (7.5)                         | 27.4 (5.2)                             | 29.1 (6.0)                            | 27.0 (4.1)                               |
| Living with a partner, n (%)                       | 28 (78%)                           | 118 (85%)                              | 98 (84%)                              | 121 (83%)                                |
| Education, high <sup>s</sup> , n (%)               | 11 (31%)                           | 34 (24%)                               | 36 (31%)                              | 35 (24%)                                 |
| <b>Hand-specific characteristics</b>               |                                    |                                        |                                       |                                          |
| Fulfilling ACR hand OA criteria, n (%)             | 29 (81%)                           | 120 (86%)                              | 105 (90%)                             | 126 (86%)                                |
| Erosive hand OA, n (%)                             | 8 (23%)                            | 31 (22%)                               | 23 (20%)                              | 40 (27%)                                 |
| Symptom duration, years <sup>^</sup>               | 4.3 (1.2;11.6)                     | 4.1 (1.6;8.0)                          | 4.8 (1.6;10.3)                        | 4.4 (2.2;9.4)                            |
| AUSCAN hand pain (0-20)                            | 11 (4)                             | 10 (4)                                 | 11 (4)                                | 8 (4)                                    |
| AUSCAN hand function (0-36)                        | 19 (8)                             | 16 (9)                                 | 19 (7)                                | 13 (8)                                   |
| Tender joint count (0-30) <sup>^</sup>             | 6 (2;9)                            | 2 (1;5)                                | 4 (2;8)                               | 2 (1;6)                                  |
| KL summated score (0-120) <sup>^</sup>             | 13 (5;21)                          | 12 (5;19)                              | 13 (6;21)                             | 13 (6;24)                                |
| <b>General burden</b>                              |                                    |                                        |                                       |                                          |
| Any comorbidity present, n (%)                     | 19 (53%)                           | 65 (47%)                               | 77 (66%)                              | 63 (43%)                                 |
| Amount of comorbidities <sup>^</sup>               | 1 (0;1)                            | 0 (0;1)                                | 1 (0;1)                               | 0 (0;1)                                  |
| Fulfilling ACR hip osteoarthritis criteria, n (%)  | 5 (14%)                            | 4 (3%)                                 | 9 (8%)                                | 9 (6%)                                   |
| Fulfilling ACR knee osteoarthritis criteria, n (%) | 15 (42%)                           | 37 (27%)                               | 40 (34%)                              | 51 (35%)                                 |
| HADS total score (0-42) <sup>^</sup>               | 7 (5;12)                           | 7 (4;11)                               | 8 (5;14)                              | 7 (4;12)                                 |
| <b>Work characteristics</b>                        |                                    |                                        |                                       |                                          |
| Retired, n (%)                                     | -                                  | -                                      | 6 (5%)                                | 11 (8%)                                  |
| Full work disability, n (%)                        | 0 (0%)                             | 0 (0%)                                 | 13 (11%)                              | 11 (8%)                                  |
| Full work disability due to hand OA, n (%)         | 0 (0%)                             | 0 (0%)                                 | 2 (1%)                                | 3 (2%)                                   |
| Partial work disability, n (%)                     | 3 (8%)                             | 5 (4%)                                 | 7 (6%)                                | 6 (4%)                                   |
| Partial work disability due to hand OA, n (%)      | 1 (3%)                             | 3 (2%)                                 | 2 (1%)                                | 3 (2%)                                   |
| Unpaid work replacement, n (%)                     | 20 (56%)                           | 46 (33%)                               | -                                     | -                                        |
| Paid work productivity loss, n (%)                 | -                                  | -                                      | 13 (11%)                              | 15 (10%)                                 |
| Predominantly manual profession*, n (%)            | 1 (3%)                             | 9 (7%)                                 | 4 (3%)                                | 15 (10%)                                 |

Numbers represent mean unless otherwise specified. § defined as having completed university level education. ^ median ^ median (IQR). \* Defined as a score of 5 or 6 on the scale by de Zwart et al (21). Abbreviations: SD = standard deviation, BMI = Body Mass Index, HADS = Hospital Anxiety and Depression Scale, ACR = American College of Rheumatology, AUSCAN = Australian Canadian Osteoarthritis Hand Index, KL = Kellgren Lawrence.

**Table 4. Outcomes of the Health and Labour Questionnaire for all patients (n=263), concerning unpaid work in the last two weeks.**

| Activities                      | Hours performed | Perceived hinder due to hand<br>OA (n, (%)) | Patients needing<br>replacement (n, (%)) | Hours replaced in case of<br>replacement |
|---------------------------------|-----------------|---------------------------------------------|------------------------------------------|------------------------------------------|
| Total                           | 48 (32;70)      | 213 (81%)                                   | 117 (45%)                                | 9 (4;15)                                 |
| Housekeeping                    | 14 (10;20)      | 189 (72%)                                   |                                          |                                          |
| Groceries                       | 4 (2;6)         | 157 (60%)                                   |                                          |                                          |
| Chores                          | 2 (0;4)         | 150 (57%)                                   |                                          |                                          |
| Activities with<br>own children | 1 (0;5.5)       | 61 (23%)                                    |                                          |                                          |

Numbers represent median (IQR) unless otherwise specified. Abbreviations: OA = osteoarthritis
